# Supplementary material
Source: Research Square preprint supplement (doi:10.21203/rs.3.rs-9231692/v1)
Supplement: Supplementary file 1 [file ff0d0a522959e9b466d685b2.docx]

**Supplementary Material**

**Supplementary Figures**


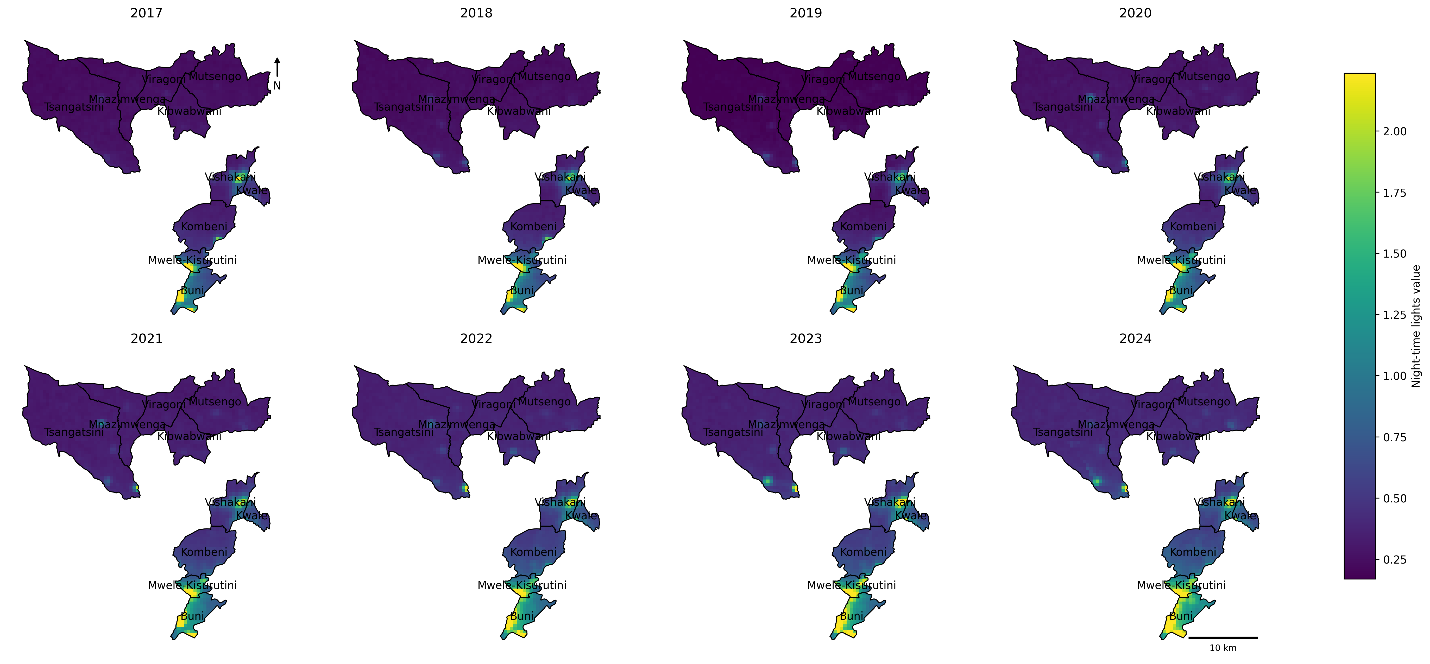


**Supplementary Figure S1.** *Annual spatial panels of nighttime lights intensity by CHU, 2017 to 2024.* Notes: Annual values are derived from VIIRS nighttime lights and summarized to the CHU scale.


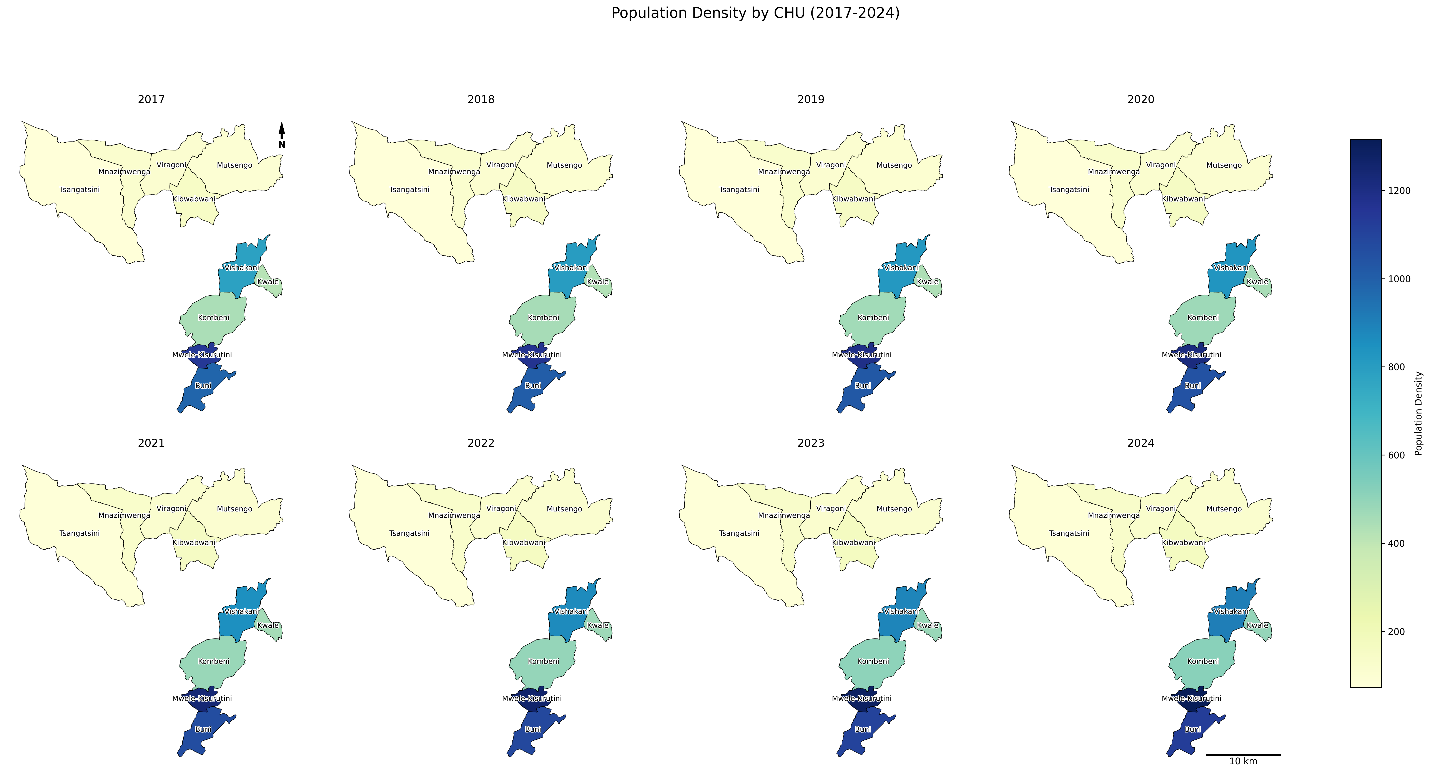


**Supplementary Figure S2.** *Annual spatial panels of WorldPop population density by CHU, 2017 to 2024.* Notes: Population density is expressed as persons per km² and summarized to the CHU scale.


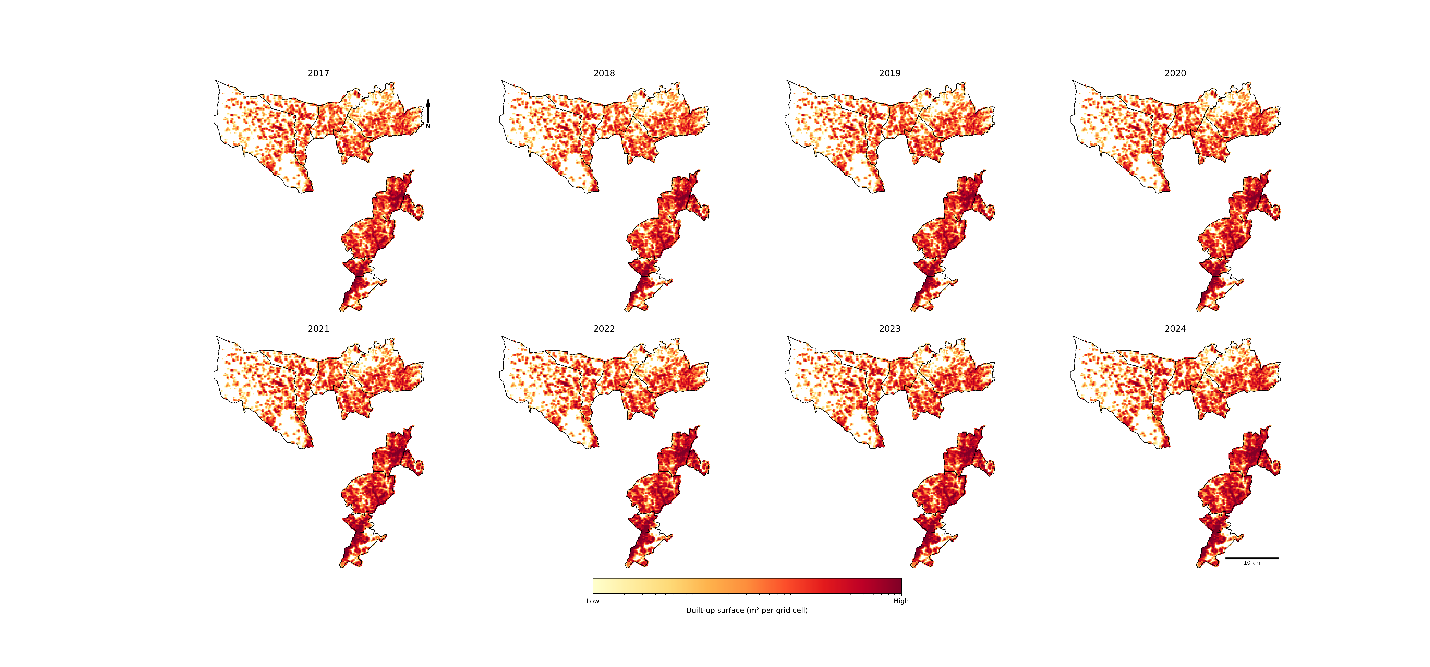


**Supplementary Figure S3.** *Annual spatial panels of WorldPop built-up area by CHU, 2017 to 2024.* Notes: Built-up area is expressed as a percentage and summarized to the CHU scale.


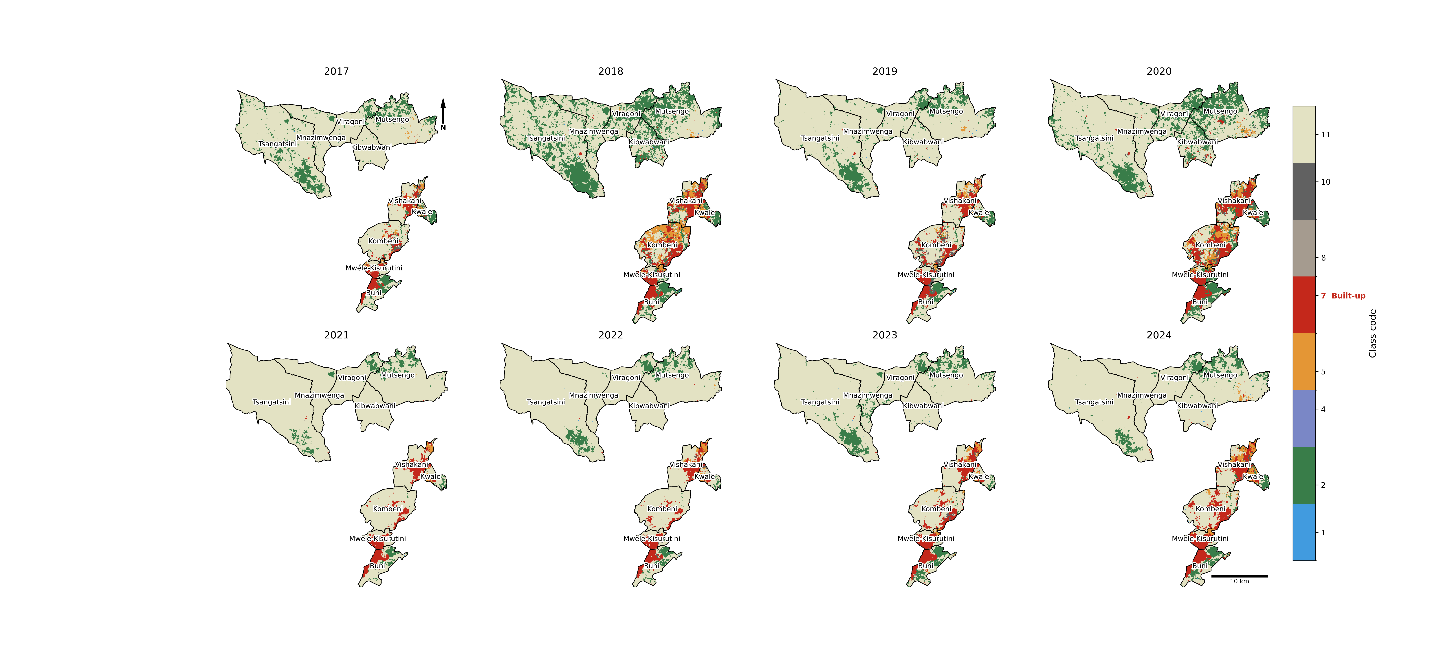


**Supplementary Figure S4.** *Annual spatial panels of Sentinel-2 built-up percentage by CHU, 2017 to 2024.* Notes: Apparent volatility should be interpreted in the context of small baseline values in some CHUs, which can amplify percent change metrics.


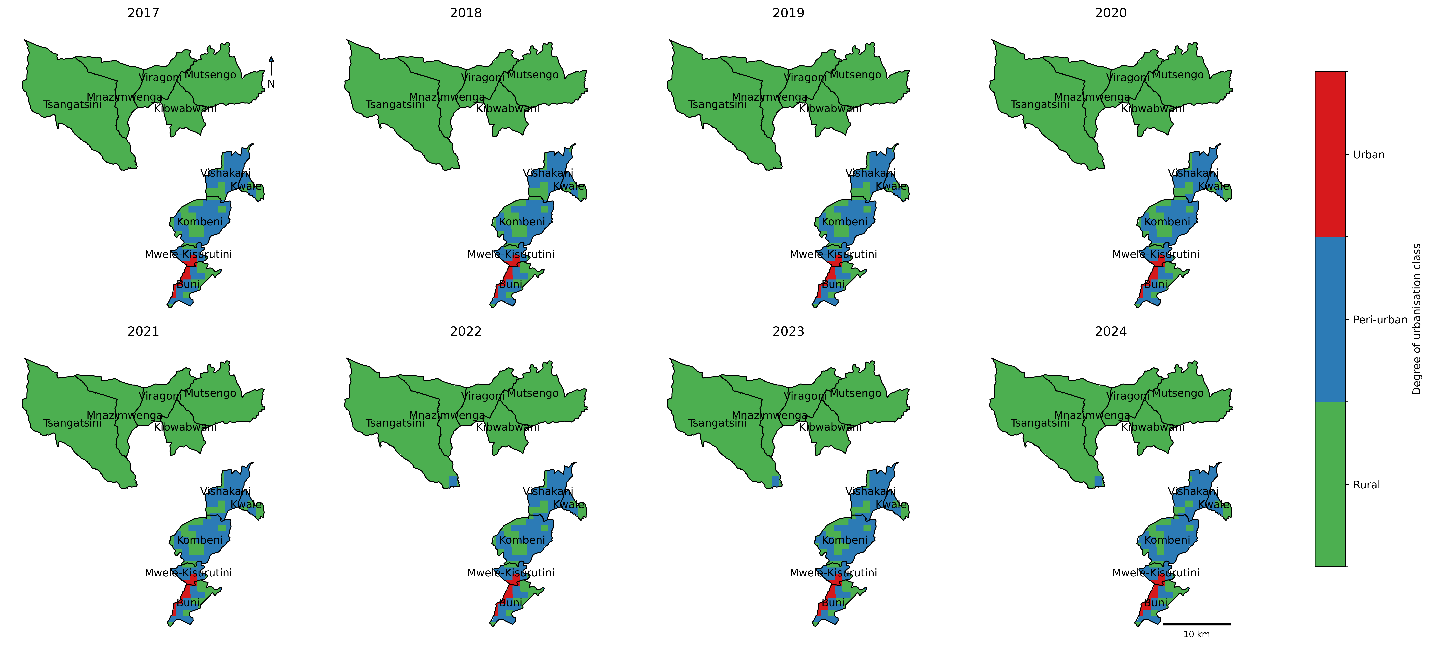


**Supplementary Figure S5.** *Annual spatial panels of Degree of Urbanization (urban percentage) by CHU, 2017 to 2024.* Notes: The figure visualizes the floor effect, including CHUs with 0% urban percentage across all years.


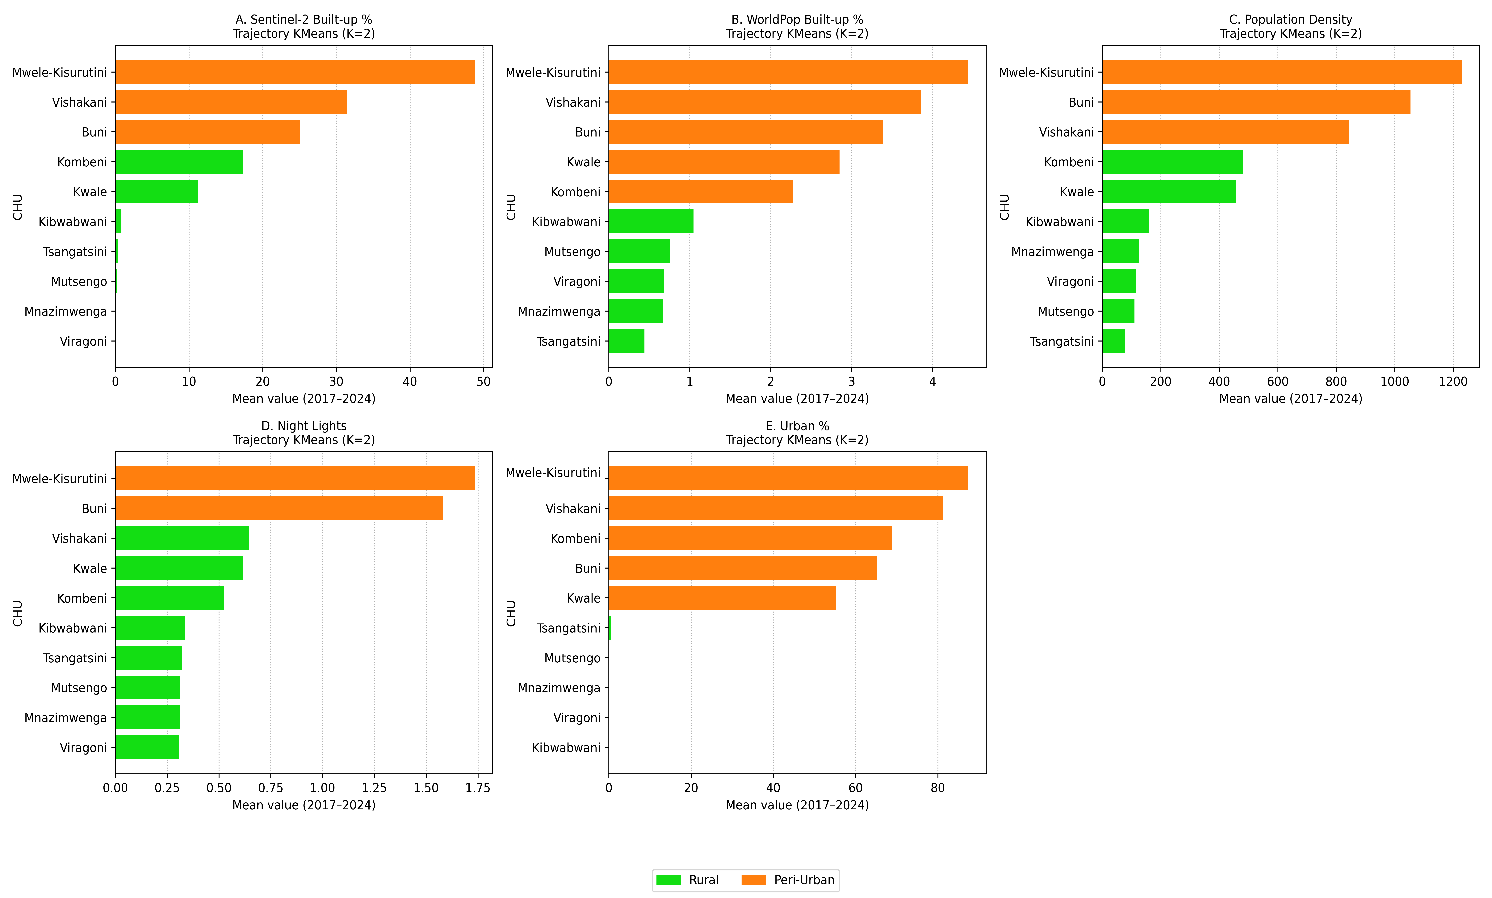


**Supplementary Figure S6 (A to E).** *Proxy-specific k-means classification using CHU mean values, 2017 to 2024.* Panel A: Sentinel-2 built-up percentage; Panel B: WorldPop built-up percentage; Panel C: WorldPop population density; Panel D: nighttime lights intensity; Panel E: Degree of Urbanization (urban percentage). Bar colour indicates cluster membership (lower-intensity: rural; higher-intensity: peri-urban). These panels provide the proxy-specific inputs used to construct the cross-proxy vote score.

**Supplementary Tables**

**Supplementary Table S1a.** CHU-level baseline, endline, absolute change, and cumulative percent change for nighttime lights intensity, 2017 to 2024.

| **CHU** | **2017 baseline** | **2024 endline** | **Absolute change** | **Cumulative % change** |
| --- | --- | --- | --- | --- |
| Buni | 1.243 | 2.184 | 0.942 | 75.8% |
| Kibwabwani | 0.286 | 0.437 | 0.152 | 53.2% |
| Kombeni | 0.405 | 0.713 | 0.307 | 75.8% |
| Kwale | 0.483 | 0.793 | 0.310 | 64.2% |
| Mnazimwenga | 0.253 | 0.405 | 0.152 | 60.2% |
| Mutsengo | 0.252 | 0.416 | 0.164 | 65.0% |
| Mwele Kisurutini | 1.321 | 1.922 | 0.602 | 45.6% |
| Tsangatsini | 0.256 | 0.437 | 0.181 | 70.6% |
| Viragoni | 0.261 | 0.395 | 0.134 | 51.3% |
| Vishakani | 0.536 | 0.810 | 0.274 | 51.2% |

Notes: Cumulative percent change is undefined if the 2017 baseline equals zero.

**Supplementary Table S1b.** CHU-level baseline, endline, absolute change, and cumulative percent change for Sentinel-2 built-up percentage, 2017 to 2024.

| **CHU** | **2017 baseline** | **2024 endline** | **Absolute change** | **Cumulative % change** |
| --- | --- | --- | --- | --- |
| Buni | 20.998 | 28.417 | 7.419 | 35.3% |
| Kibwabwani | 0.001 | 0.392 | 0.391 | 30175.0% |
| Kombeni | 10.513 | 22.155 | 11.642 | 110.7% |
| Kwale | 6.135 | 12.412 | 6.276 | 102.3% |
| Mnazimwenga | 0.004 | 0.027 | 0.022 | 505.6% |
| Mutsengo | 0.105 | 0.335 | 0.230 | 218.9% |
| Mwele Kisurutini | 42.074 | 58.637 | 16.563 | 39.4% |
| Tsangatsini | 0.189 | 0.426 | 0.237 | 125.1% |
| Viragoni | 0.000 | 0.001 | 0.001 |  |
| Vishakani | 25.896 | 32.454 | 6.558 | 25.3% |

Notes: Large cumulative percent changes can occur when the 2017 baseline is close to zero. Cumulative percent change is undefined where the 2017 baseline equals zero.

**Supplementary Table S1c.** CHU-level baseline, endline, absolute change, and cumulative percent change for WorldPop built-up area, 2017 to 2024.

| **CHU** | **2017 baseline** | **2024 endline** | **Absolute change** | **Cumulative % change** |
| --- | --- | --- | --- | --- |
| Buni | 3.07 | 3.677 | 0.607 | 19.8% |
| Kibwabwani | 0.867 | 1.239 | 0.372 | 42.9% |
| Kombeni | 1.777 | 2.766 | 0.989 | 55.7% |
| Kwale | 2.365 | 3.386 | 1.021 | 43.2% |
| Mnazimwenga | 0.589 | 0.761 | 0.172 | 29.2% |
| Mutsengo | 0.583 | 0.930 | 0.347 | 59.5% |
| Mwele Kisurutini | 3.874 | 4.952 | 1.078 | 27.8% |
| Tsangatsini | 0.397 | 0.486 | 0.089 | 22.4% |
| Viragoni | 0.581 | 0.778 | 0.197 | 33.9% |
| Vishakani | 3.291 | 4.422 | 1.131 | 34.4% |

Notes: Built-up area expressed as percentage. All CHUs have non-zero 2017 baselines.

**Supplementary Table S1d.** CHU-level baseline, endline, absolute change, and cumulative percent change for WorldPop population density, 2017 to 2024.

| **CHU** | **2017 baseline** | **2024 endline** | **Absolute change** | **Cumulative % change** |
| --- | --- | --- | --- | --- |
| Buni | 985.1 | 1123.8 | 138.7 | 14.1% |
| Kibwabwani | 147.8 | 168.9 | 21.1 | 14.3% |
| Kombeni | 446.4 | 515.9 | 69.5 | 15.6% |
| Kwale | 421.4 | 495.3 | 73.9 | 17.5% |
| Mnazimwenga | 118.9 | 134.1 | 15.2 | 12.8% |
| Mutsengo | 102.0 | 117.7 | 15.8 | 15.5% |
| Mwele Kisurutini | 1143.1 | 1315.2 | 172.1 | 15.1% |
| Tsangatsini | 73.4 | 83.2 | 9.8 | 13.4% |
| Viragoni | 107.9 | 122.0 | 14.1 | 13.1% |
| Vishakani | 785.3 | 904.9 | 119.7 | 15.2% |

Notes: Population density expressed as persons per km².

**Supplementary Table S1e.** CHU-level baseline, endline, absolute change, and cumulative percent change for Degree of Urbanization (urban percentage), 2017 to 2024.

| **CHU** | **2017 baseline** | **2024 endline** | **Absolute change** | **Cumulative % change** |
| --- | --- | --- | --- | --- |
| Buni | 65.02% | 65.34% | 0.31 pp | 0.5% |
| Kibwabwani | 0.00% | 0.00% | 0.00 pp |  |
| Kombeni | 65.44% | 74.98% | 9.54 pp | 14.6% |
| Kwale | 52.69% | 59.62% | 6.93 pp | 13.2% |
| Mnazimwenga | 0.00% | 0.00% | 0.00 pp |  |
| Mutsengo | 0.00% | 0.00% | 0.00 pp |  |
| Mwele Kisurutini | 87.36% | 87.36% | 0.00 pp | 0.0% |
| Tsangatsini | 0.00% | 1.18% | 1.18 pp |  |
| Viragoni | 0.00% | 0.00% | 0.00 pp |  |
| Vishakani | 77.01% | 89.06% | 12.05 pp | 15.7% |

Notes: Absolute change in percentage points (pp). Cumulative percent change undefined for CHUs with 0% baseline.

**Supplementary Table S2.** Proxy-specific cluster assignments and vote score components used to derive cross-proxy consensus classification.

| **CHU** | **NTL** | **Sentinel-2** | **WP built up** | **WP density** | **Urban %** | **Score** | **Classification** |
| --- | --- | --- | --- | --- | --- | --- | --- |
| Buni | 1 | 1 | 1 | 1 | 1 | 5 | Peri-urban |
| Kibwabwani | 0 | 0 | 0 | 0 | 0 | 0 | Rural |
| Kombeni | 0 | 0 | 1 | 0 | 1 | 2 | Rural |
| Kwale | 0 | 0 | 1 | 0 | 1 | 2 | Rural |
| Mnazimwenga | 0 | 0 | 0 | 0 | 0 | 0 | Rural |
| Mutsengo | 0 | 0 | 0 | 0 | 0 | 0 | Rural |
| Mwele Kisurutini | 1 | 1 | 1 | 1 | 1 | 5 | Peri-urban |
| Tsangatsini | 0 | 0 | 0 | 0 | 0 | 0 | Rural |
| Viragoni | 0 | 0 | 0 | 0 | 0 | 0 | Rural |
| Vishakani | 0 | 1 | 1 | 1 | 1 | 4 | Peri-urban |

Notes: Higher-intensity cluster = 1; lower-intensity = 0. NTL = nighttime lights; WP = WorldPop. Vote score is the sum across proxies.

**Supplementary Table S3.** Availability of cumulative percent change outcomes from 2017 to 2024 by proxy.

| **Proxy** | **Total possible CHUs** | **Defined CHUs** | **Undefined CHUs** | **Reason undefined** |
| --- | --- | --- | --- | --- |
| Nighttime lights intensity | 10 | 10 | 0 |  |
| Sentinel-2 built up | 10 | 9 | 1 | Baseline equals 0 for 1 CHU |
| WorldPop built-up area | 10 | 10 | 0 |  |
| WorldPop population density | 10 | 10 | 0 |  |
| Urban percentage | 10 | 5 | 5 | Baseline equals 0 for 5 CHUs |

Notes: Cumulative percent change undefined when the 2017 baseline equals zero.

**Supplementary Table S4A.** Pearson correlations between proxies using pooled raw values (80 CHU-year observations).

| **Proxy pair** | **r (95% CI)** | **p-value** | **N** |
| --- | --- | --- | --- |
| Nighttime lights vs Sentinel-2 built up | 0.815 (0.725, 0.877) | <0.0001 | 80 |
| Nighttime lights vs WorldPop built-up area | 0.809 (0.717, 0.874) | <0.0001 | 80 |
| Nighttime lights vs WorldPop population density | 0.907 (0.858, 0.939) | <0.0001 | 80 |
| Nighttime lights vs urban percentage | 0.710 (0.581, 0.804) | <0.0001 | 80 |
| Sentinel-2 built up vs WorldPop built-up area | 0.925 (0.885, 0.951) | <0.0001 | 80 |
| Sentinel-2 built up vs WorldPop population density | 0.943 (0.912, 0.963) | <0.0001 | 80 |
| Sentinel-2 built up vs urban percentage | 0.894 (0.840, 0.931) | <0.0001 | 80 |
| WorldPop built-up area vs WorldPop population density | 0.954 (0.929, 0.970) | <0.0001 | 80 |
| WorldPop built-up area vs urban percentage | 0.955 (0.931, 0.971) | <0.0001 | 80 |
| WorldPop population density vs urban percentage | 0.906 (0.856, 0.939) | <0.0001 | 80 |

Notes: All p values below 0.0001.

**Supplementary Table S4B.** Pearson correlations between proxies using pooled year-to-year percent changes across defined transitions.

| **Proxy pair** | **r (95% CI)** | **p-value** | **N** |
| --- | --- | --- | --- |
| Nighttime lights vs Sentinel-2 built up | −0.095 (−0.339, 0.161) | 0.4668 | 61 |
| Nighttime lights vs WorldPop built-up area | −0.019 (−0.253, 0.217) | 0.8764 | 70 |
| Nighttime lights vs WorldPop population density | −0.046 (−0.278, 0.191) | 0.7057 | 70 |
| Nighttime lights vs urban percentage | 0.189 (−0.144, 0.483) | 0.2638 | 37 |
| Sentinel-2 built up vs WorldPop built-up area | 0.076 (−0.179, 0.322) | 0.5586 | 61 |
| Sentinel-2 built up vs WorldPop population density | 0.104 (−0.151, 0.347) | 0.4230 | 61 |
| Sentinel-2 built up vs urban percentage | −0.039 (−0.359, 0.288) | 0.8165 | 37 |
| WorldPop built-up area vs WorldPop population density | 0.484 (0.281, 0.646) | <0.0001 | 70 |
| WorldPop built-up area vs urban percentage | 0.186 (−0.147, 0.481) | 0.2709 | 37 |
| WorldPop population density vs urban percentage | 0.243 (−0.088, 0.526) | 0.1475 | 37 |

Notes: Only WorldPop built-up area and population density show a statistically significant correlation (p < 0.0001).

**Supplementary Table S4C.** Pearson correlations between proxies using CHU-level cumulative percent changes.

| **Proxy pair** | **r (95% CI)** | **p-value** | **N** |
| --- | --- | --- | --- |
| Nighttime lights vs Sentinel-2 built up | −0.319 (−0.811, 0.438) | 0.4028 | 9 |
| Nighttime lights vs WorldPop built-up area | 0.116 (−0.554, 0.695) | 0.7501 | 10 |
| Nighttime lights vs WorldPop population density | 0.097 (−0.567, 0.685) | 0.7896 | 10 |
| Nighttime lights vs urban percentage | 0.103 (−0.857, 0.903) | 0.8689 | 5 |
| Sentinel-2 built up vs WorldPop built-up area | 0.153 (−0.569, 0.742) | 0.6952 | 9 |
| Sentinel-2 built up vs WorldPop population density | −0.151 (−0.741, 0.570) | 0.6974 | 9 |
| Sentinel-2 built up vs urban percentage | 0.492 (−0.689, 0.958) | 0.3993 | 5 |
| WorldPop built-up area vs WorldPop population density | 0.552 (−0.119, 0.877) | 0.0979 | 10 |
| WorldPop built-up area vs urban percentage | 0.782 (−0.323, 0.985) | 0.1180 | 5 |
| WorldPop population density vs urban percentage | 0.573 (−0.626, 0.967) | 0.3128 | 5 |

Notes: Confidence intervals are wide owing to small effective sample sizes. No correlations are statistically significant at p < 0.05.

**Supplementary Table S5.** Cross-proxy vote scores and consensus classification from k-means clustering applied independently to each proxy.

| **CHU** | **Vote score (0 to 5)** | **Consensus classification** |
| --- | --- | --- |
| Buni | 5 | Peri-urban |
| Mwele Kisurutini | 5 | Peri-urban |
| Vishakani | 4 | Peri-urban |
| Kombeni | 2 | Rural |
| Kwale | 2 | Rural |
| Kibwabwani | 0 | Rural |
| Mutsengo | 0 | Rural |
| Mnazimwenga | 0 | Rural |
| Tsangatsini | 0 | Rural |
| Viragoni | 0 | Rural |

Notes: Consensus peri-urban is defined as vote score 3 to 5.
